# Supplementary material
Source: publisher figshare collection journal article supplement (https://acs.figshare.com/ndownloader/files/5518514)
Supplement: Supplementary file 1 [file 5518514]

## Supporting information

### **Unusual Conversion-type Lithiation in $\text{LiVO}_3$ Electrode for Lithium-Ion Batteries**

Jeong Beom Lee,<sup>†</sup> Janghyuk Moon,<sup>‡</sup> Oh B. Chae,<sup>†</sup> Jae Gil Lee,<sup>†</sup> Ji Heon Ryu,<sup>§</sup>

Maenghyo Cho,<sup>‡</sup> Kyeongjae Cho,<sup>||</sup> and Seung M. Oh<sup>\*,†</sup>

<sup>†</sup>Department of Chemical and Biological Engineering and Institute of Chemical Processes and <sup>‡</sup>WCU Multiscale Mechanical Design Division, Department of Mechanical and Aerospace Engineering, Seoul National University, 1 Gwanak-ro, Gwanak-gu, Seoul 08826, Republic of Korea

<sup>§</sup>Graduate School of Knowledge-based Technology and Energy, Korea Polytechnic University, 237 Sangidaehak-ro, Siheung-si, Gyeonggi 15073, Republic of Korea

<sup>||</sup> Department of Materials Science and Engineering and Department of Physics, The University of Texas at Dallas, Richardson, Texas 75080, United States

<sup>\*</sup>Corresponding author: Tel.: +82-2-880-7074

*E-mail address:* [seungoh@snu.ac.kr](mailto:seungoh@snu.ac.kr) (S. M. Oh)

## Computational details

$\text{LiVO}_3$  and  $\text{Li}_2\text{VO}_3$  structures were extracted from ICSD database, and the other structures were generated by inserting  $\text{Li}^+$  ions into the basic structures. The detailed procedure is as follows.

The structure of synthesized material was confirmed by XRD measurement. (Figure S3) It is  $\text{LiVO}_3$  (JCPDS no. 33-0835) which belongs to  $C2/c$  space group. The same structure was found in ICSD database (ICSD-68634) and geometric relaxation was performed. Since the  $\text{LiVO}_3$  phase loses its long-range order during lithiation as seen on the *ex-situ* XRD pattern (Figure S4), the intermediate phases were predicted based on the results reported by Pralong *et al.* (*Chem. Mat.*, **2012**, 24, 12-14) and electrochemical (Figure 2) and spectroscopic data (Figure 3, 4).

However, the structure of  $\text{Li}_2\text{VO}_3$  is not known. Hence, the possible candidate structures were selected from the  $\text{Li}_2[\text{TM}]\text{O}_3$  series in the ICSD database and double-checked by using the crystal prediction module provided by Materials Project. The candidate structures were further narrowed down by considering the experimental data, which suggests  $\text{V}^{4+}$  ions in octahedral sites. After all the candidates were relaxed using DFT calculation (Table S1), the most stable one was extracted, which has  $\text{Li}_2\text{MnO}_3$  structure (ICSD-46953).

All the structure and reaction potential prediction were executed based on the experimental results. The modeling of lithiation in the  $\text{LiVO}_3$  (Stage A) was performed as follows. One  $\text{Li}^+$  ion was added into the interstitial sites or vacancies existing in  $2 \times 1 \times 1$  cell of  $\text{LiVO}_3$  (contains 8  $\text{Li}^+$  ions) and the structures were relaxed using DFT calculation to find the most stable one. The same procedure was repeated until 8  $\text{Li}^+$  ions were inserted into the  $2 \times 1 \times 1$  cell of  $\text{LiVO}_3$  to generate  $\text{Li}_2\text{VO}_3$ .  $\text{Li}^+$  extraction in  $2 \times 1 \times 1$  cell of  $\text{Li}_2\text{VO}_3$  structure was also performed. The formation energy was calculated using the following equation.

$$\Delta E_f = E_f(\text{Li}_y \text{VO}_3) - [E_f(\text{Li}_x \text{VO}_3) + (y - x)E_f(\text{Li})]$$

The formation energies of  $\text{Li}_{1+x}\text{VO}_3$  ( $0 < x < 1$ ) (single-phase reaction) were then compared to

that of the two-phase reaction between  $\text{LiVO}_3$  and  $\text{Li}_2\text{VO}_3$ . As seen in Figure S5a, the formation energies for the single-phase reaction show larger value than that of two-phase reaction, implying that the two-phase reaction is thermodynamically favored. The voltage plateaus obtained from the calculated formation energies were determined by convex hull theorem. The reaction potential during lithiation was calculated using the following equation.

$$V = -\frac{\Delta E_f}{(y-x)F}$$

The lithiation in  $\text{Li}_2\text{VO}_3$  was performed in the same way.  $\text{Li}^+$  ion was inserted into the interstitial sites or vacancies existing in  $2 \times 1 \times 1$  cell of  $\text{Li}_2\text{VO}_3$  (contains 16  $\text{Li}^+$ ) and the geometry relaxation was performed. To simulate the amorphous structure of  $\text{Li}_{2+x}\text{VO}_3$ , Molecular Dynamics (MD) simulation ( $T = 1200 \text{ K}$ ) was performed. The layered structure of  $\text{Li}_2\text{VO}_3$  maintains until the 8  $\text{Li}^+$  addition. However, the layered structure starts to collapse after  $\text{Li}_{2.5}\text{VO}_3$  ( $x = 1.5$ ); after all the possible interstitial site are occupied by  $\text{Li}^+$  ions. Further lithiation was simulated by continuously adding  $\text{Li}^+$  ions into the largest void space by Delaunay triangulation method. The structures were then MD simulated and relaxed repeatedly. Finally, after 5  $\text{Li}^+$  addition into  $\text{LiVO}_3$ , the vanadium metal cluster and Li-O cluster can be obtained.

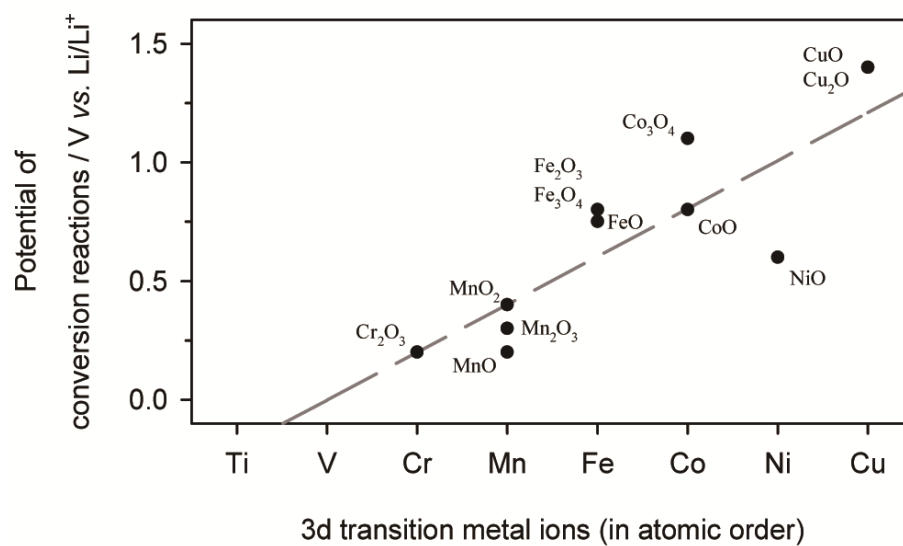

**Figure S1.** The empirical values and their regression curve of conversion plateau of 3d transition metal oxides.<sup>1</sup>

## Reference

- (1) Cabana, J.; Monconduit, L.; Larcher, D.; Palacín, M. R. Beyond Intercalation-Based Li-Ion Batteries: The State of the Art and Challenges of Electrode Materials Reacting through Conversion Reactions. *Adv. Mater.* **2010**, 22 (35), E170–E192.

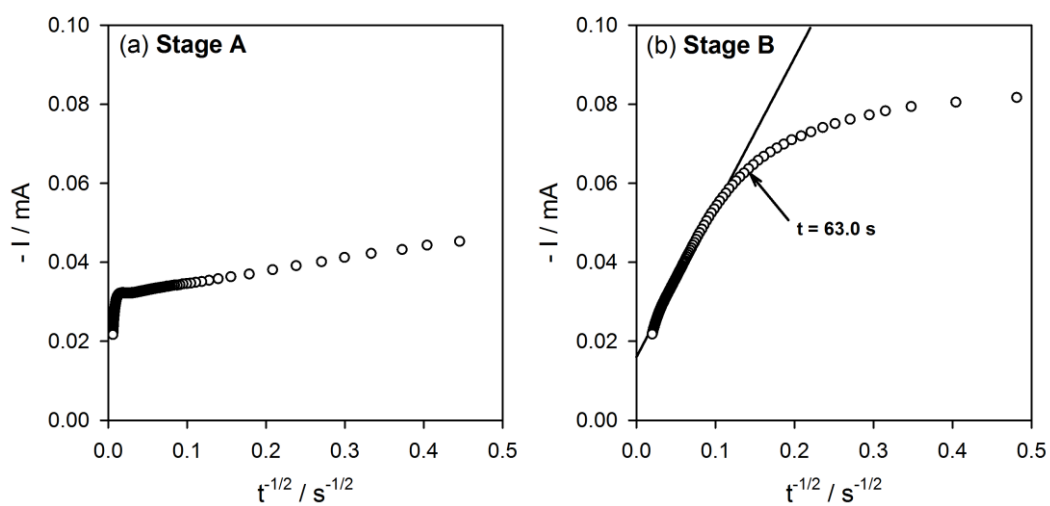

**Figure S2.** Current versus  $t^{-1/2}$  plots for the current transient in stage A and B obtained from PITT measurement.

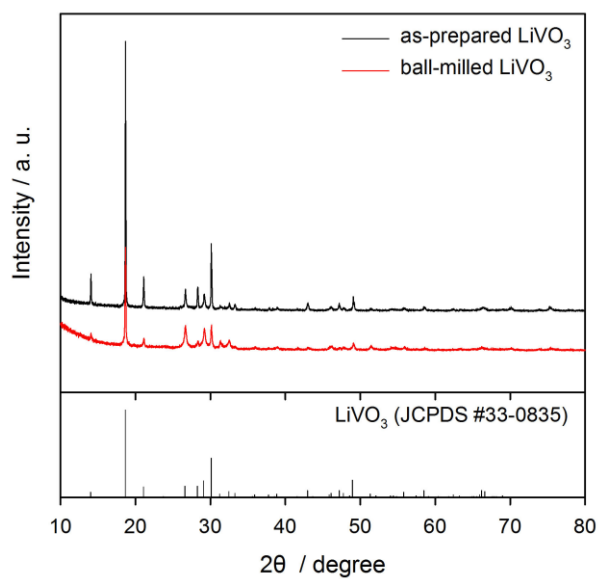

**Figure S3.** X-ray diffraction (XRD) of the synthesized  $\text{LiVO}_3$ . XRD patterns were measured with a Rigaku D/Max-3C diffractometer (Cu-K $\alpha$  radiation source,  $\lambda = 0.15418$  nm).

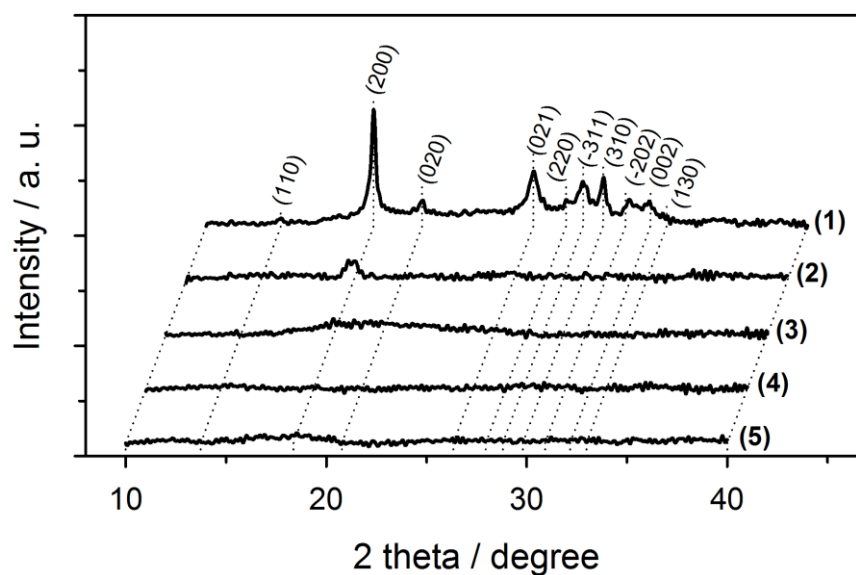

**Figure S4.** *Ex-situ* X-ray diffraction (XRD) of  $\text{LiVO}_3$ . The numbers indicate the points where the *ex-situ* XRD measurement were made in Figure 1. The cells were disassembled in an argon-filled dry glove box. XRD patterns were measured with a Rigaku D/Max-3C diffractometer (Cu-Ka radiation source,  $\lambda = 0.15418$  nm). After the measurement, all XRD patterns were calibrated with the characterizing XRD peak of the Cu foil of the electrodes.

| <b>Li<sub>2</sub>VO<sub>3</sub></b> | <b>E<sub>f</sub>/[eV/VO<sub>3</sub>]</b> | <b>Li<sub>2</sub>VO<sub>3</sub></b> | <b>E<sub>f</sub>/[eV/VO<sub>3</sub>]</b> | <b>Li<sub>2</sub>VO<sub>3</sub></b> | <b>E<sub>f</sub>/[eV/VO<sub>3</sub>]</b> |
|-------------------------------------|------------------------------------------|-------------------------------------|------------------------------------------|-------------------------------------|------------------------------------------|
| Crystal70319                        | -41.2764                                 | Crystal70398                        | -40.3891                                 | Crystal70522                        | -40.7022                                 |
| Crystal70325                        | -41.4002                                 | Crystal70441                        | -40.8925                                 | Crystal70529                        | -32.9432                                 |
| <b>Crystal70327</b>                 | <b>-41.4009</b>                          | Crystal70450                        | -40.9967                                 | Crystal70530                        | -39.2849                                 |
| Crystal70346                        | -41.2089                                 | Crystal70452                        | -40.7132                                 | Crystal70532                        | -40.7115                                 |
| Crystal70357                        | -41.3070                                 | Crystal70455                        | -40.8973                                 | Crystal70536                        | -41.0670                                 |
| Crystal70359                        | -40.9351                                 | Crystal70457                        | -41.2703                                 | Crystal70540                        | -40.3409                                 |
| Crystal70361                        | -41.0142                                 | Crystal70484                        | -41.1338                                 | Crystal70543                        | -41.0273                                 |
| Crystal70364                        | -41.2618                                 | Crystal70488                        | -41.2083                                 | Crystal70544                        | -41.0581                                 |
| Crystal70371                        | -40.7777                                 | Crystal70499                        | -41.1523                                 | Crystal70548                        | -41.3003                                 |
| Crystal70392                        | -41.2092                                 | Crystal70521                        | -40.3065                                 |                                     |                                          |

**Table S1.** Formation energies of iso-structures of Li<sub>2</sub>VO<sub>3</sub> phases obtained from ICSD and Materials project. Crystal70327, which is the most stable structure, corresponds to the structure of Li<sub>2</sub>MnO<sub>3</sub> (ICSD-46953)



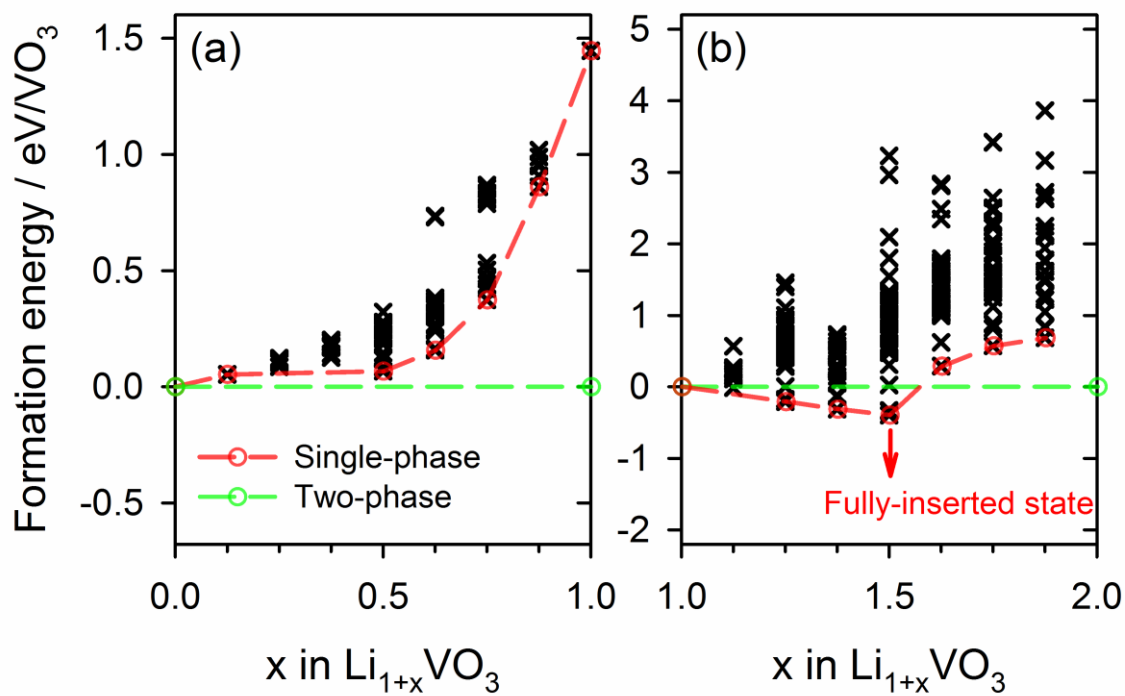

**Figure S5.** Formation energies of (a) single-phase reaction of Li<sub>1+x</sub>VO<sub>3</sub> (0 < x < 1) compared with the two-phase reaction of LiVO<sub>3</sub>/Li<sub>2</sub>VO<sub>3</sub> and (b) single-phase reaction of Li<sub>1+x</sub>VO<sub>3</sub> (1 < x < 2) compared with the two-phase reaction of Li<sub>2</sub>VO<sub>3</sub>/Li<sub>3</sub>VO<sub>3</sub>.

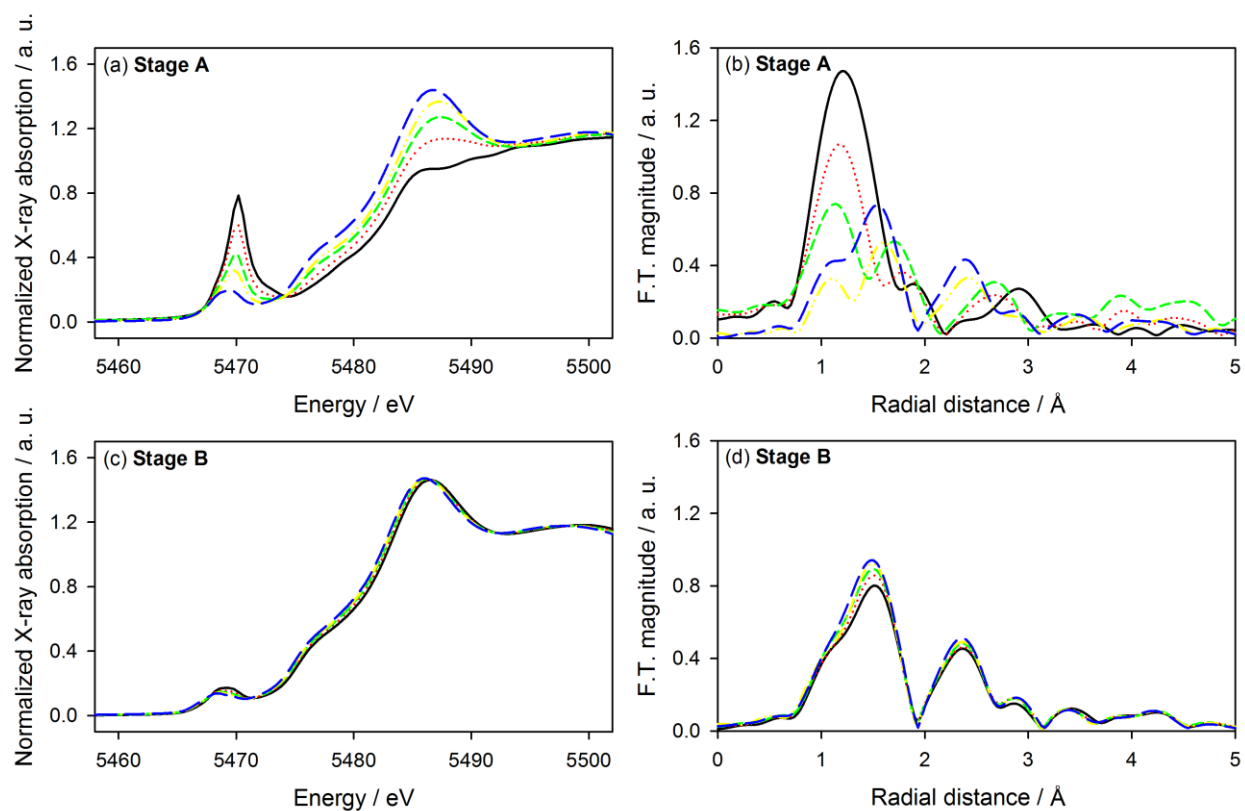

**Figure S6.** XANES and Fourier-transformed EXAFS spectra obtained during stage A (a), (b) and B (c), (d), respectively.

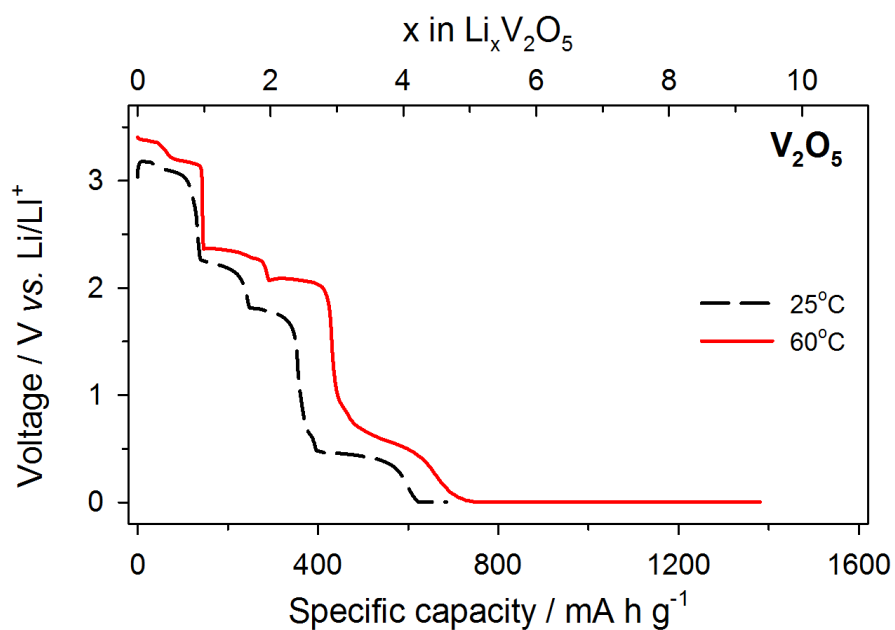

**Figure S7.** Galvanostatic lithiation voltage profiles of  $\text{Li}/\text{V}_2\text{O}_5$  cell at  $25^\circ\text{C}$  and  $60^\circ\text{C}$ . The galvanostatic cycling was performed at a current density of  $100 \text{ mA g}^{-1}$  over the potential range of  $0.005 - 3.0 \text{ V}$  (vs.  $\text{Li}/\text{Li}^+$ ) at  $25^\circ\text{C}$  and  $60^\circ\text{C}$ . Additional constant-voltage step was added at  $0.005 \text{ V}$  until the current decayed to  $10 \text{ mA g}^{-1}$ .

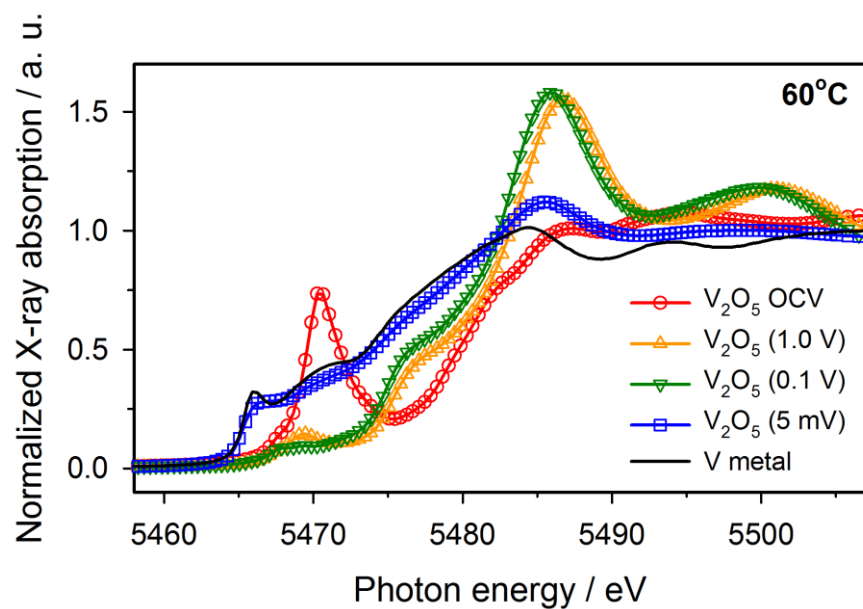

**Figure S8.** Normalized vanadium K-edge XANES spectra obtained from the  $V_2O_5$  electrodes in the first lithiation period at 60°C.
